# Supplementary material for: Virtual Reality Enables Rapid and Multi-Faceted Retinal Function Screening
Source: Research Square preprint supplement (doi:10.21203/rs.3.rs-2011868/v1), 2022-10-11
Supplement: Supplementary file 1 [file 2c3521dfd9d2db6882e631a9.docx]

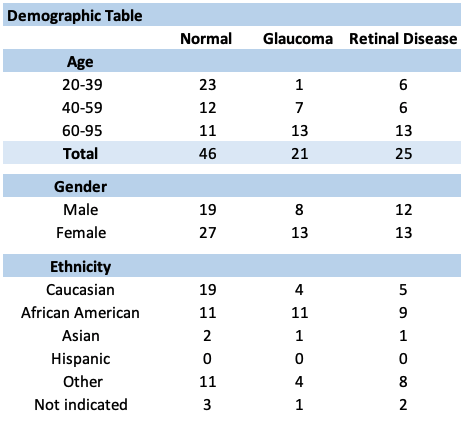


**Table 1:** A demographic breakdown of study participant subgroups.

**Table 2:** Garway-Health sensitivity and specificity values for all eyes (total = 84 eyes), controls (N = 31 eyes), and those with glaucoma (N = 22) and retinal diseases (N = 31 eyes).

**Table 3:** Ishihara color test comparison between VR analogues and in-office test results. Overall n = 110 eyes; control group n = 54 eyes; glaucoma n = 28 eyes; retinal disease group n = 28 eyes.

**Table 4:** Amsler grid non-inferiority comparison between VR analogue and in-office test results. Overall n=98 eyes; control group n=52 eyes, glaucoma group n=26 eyes, retinal disease group=20 eyes).
